# Supplementary material for: Two Schiff base iodide compounds as iodide ion conductors showing high conductivity
Source: Royal Society of Chemistry journal article supplement (doi:10.1039/d3ra02416d), 2023-01-01
Supplement: d3ra02416d1.pdf [file d3ra02416d1.pdf]

### Preparations of compounds **1** and **2**

[*m*-BrBz-1-APy] $I_3$  (**1**) was prepared by 3-bromobenzaldehyde (2 mmol) with 1-aminopyridinium iodide (2 mmol) in ethanol (10 cm<sup>3</sup>). The solution was heated under reflux for 5 h. On cooling the product was separated out and washed with ether. The methanol solution of iodine (2 mmol) was slowly added to methanol solution of [*m*-BrBz-1-APy] $I_3$  (2 mmol) at room temperature. The solution was slowly evaporated and red block crystals **2** were obtained after 7 days. Yield: 75%. Anal. Calc. For C<sub>12</sub>H<sub>10</sub>N<sub>2</sub>BrI<sub>3</sub>: C, 22.42; H, 1.57; N, 4.36. Found: C, 22.65; H, 1.48; N, 4.25.

[*o*-FBz-1-APy]I (**2**). Yield: 80%. Anal. Calc. For C<sub>12</sub>H<sub>10</sub>N<sub>2</sub>FI<sub>3</sub>: C, 24.76; H, 1.73; N, 4.81. Found: C, 24.65; H, 2.08; N, 4.47.

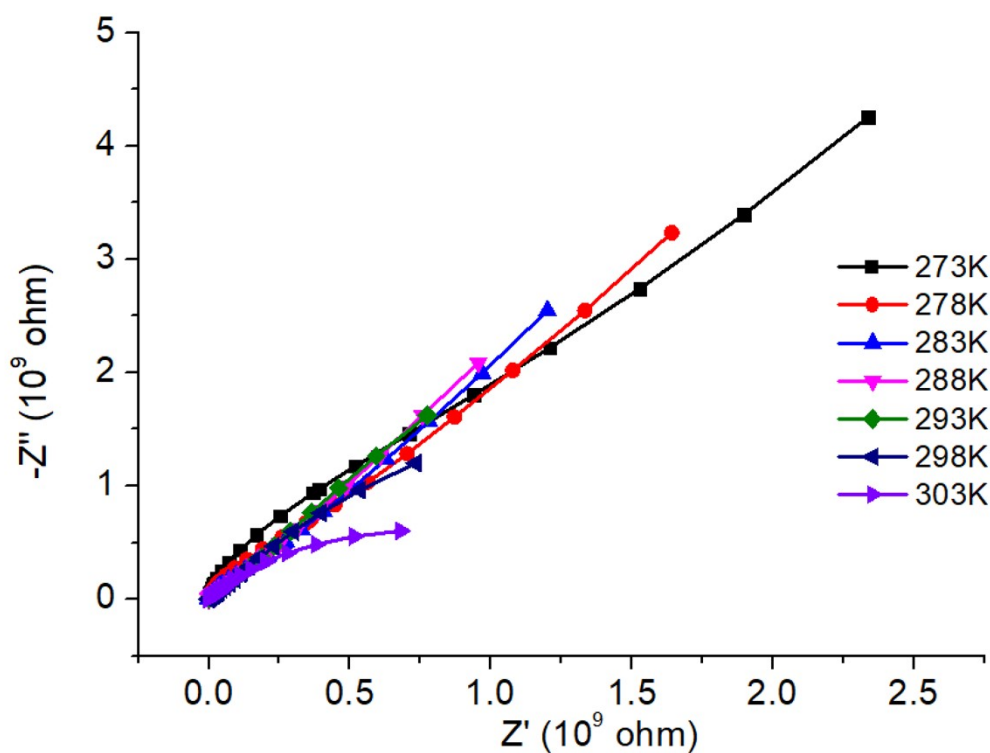

Figure S1. Impedance spectra at the selected temperatures in the range of 273-303 K for **1**

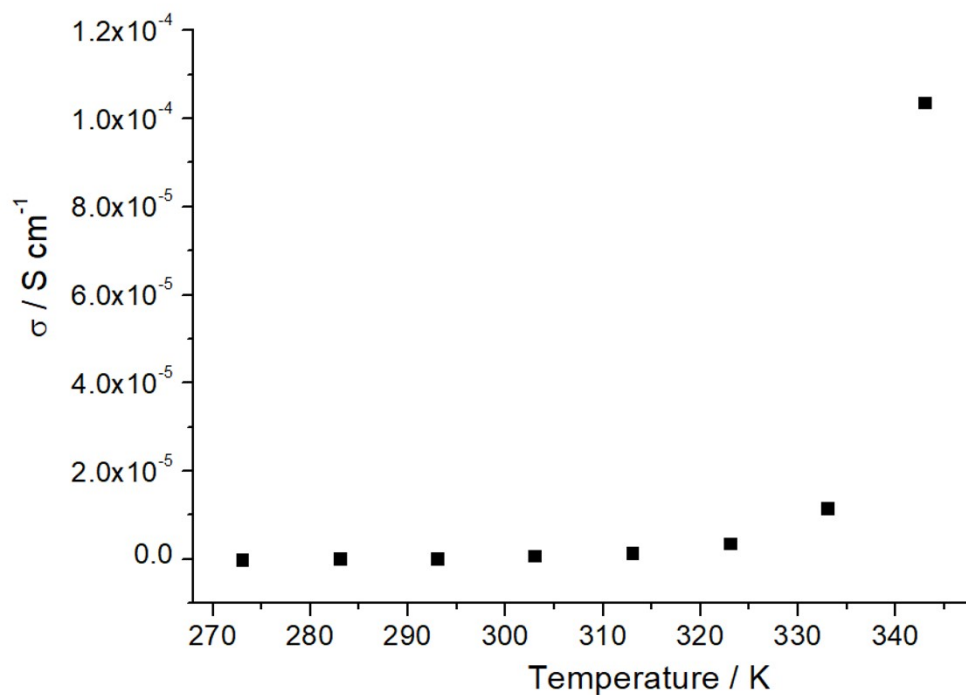

Figure S2. The plot of ionic conductivity versus temperature for **1** showing steeply increase at 343 K.

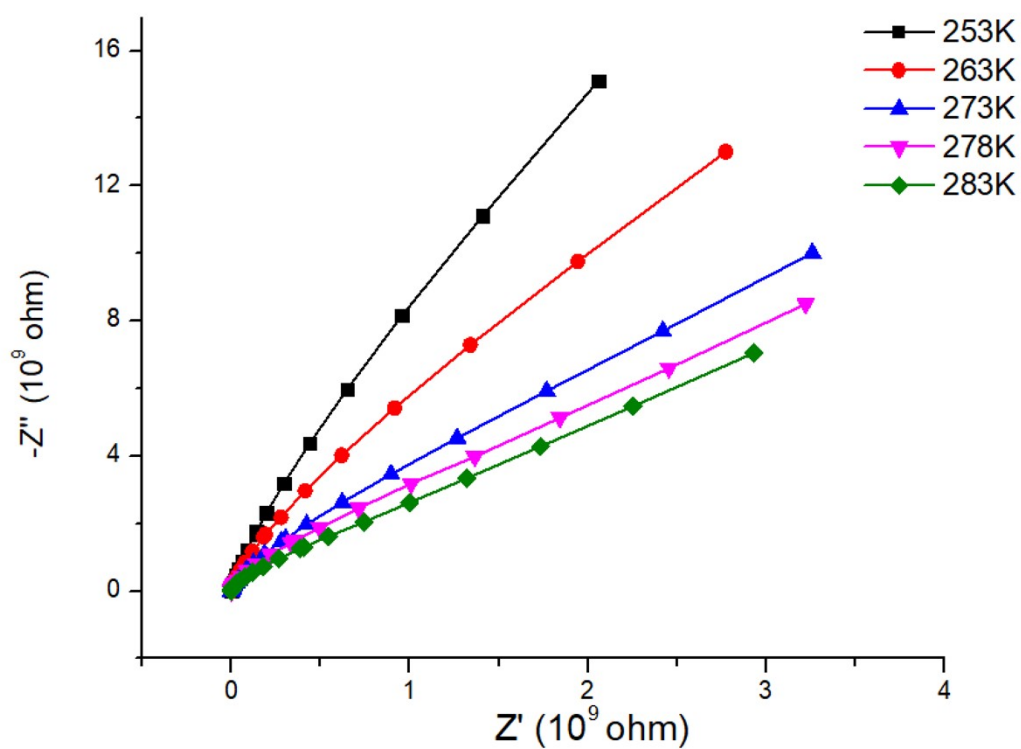

Figure S3. Impedance spectra at the selected temperatures in the range of 253-283 K for **2**.

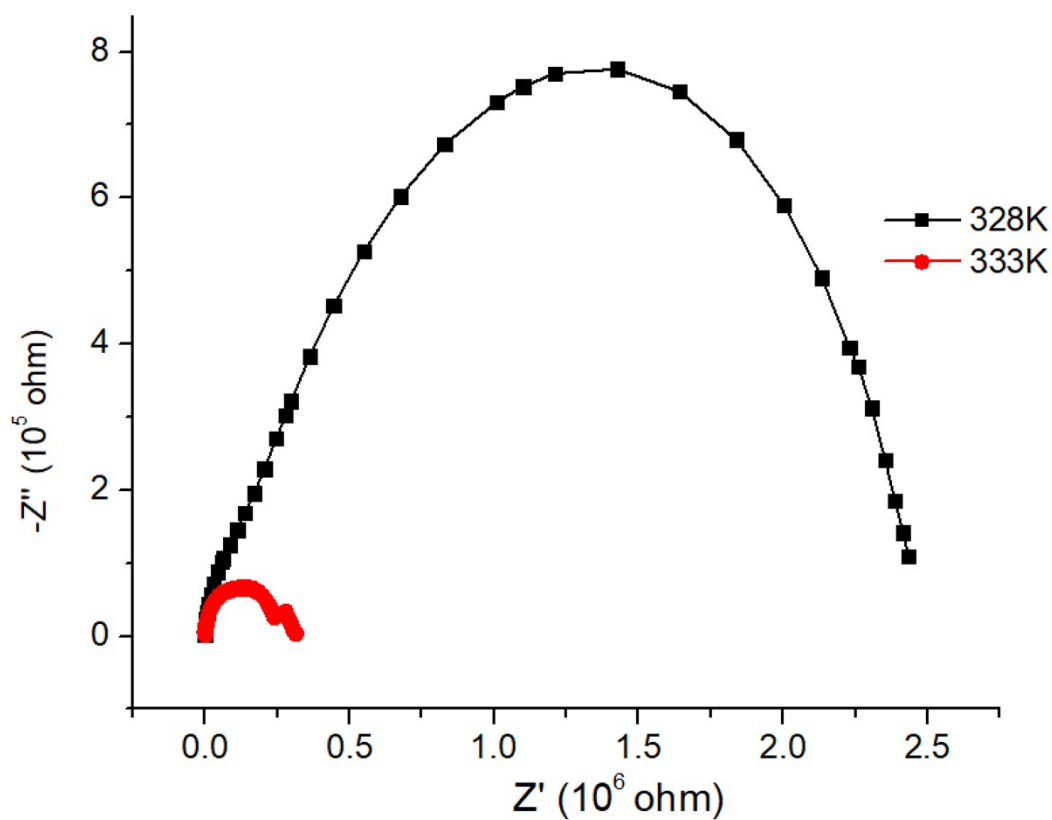

Figure S4. Impedance spectra at the temperatures of 328 and 333 K for **2**.

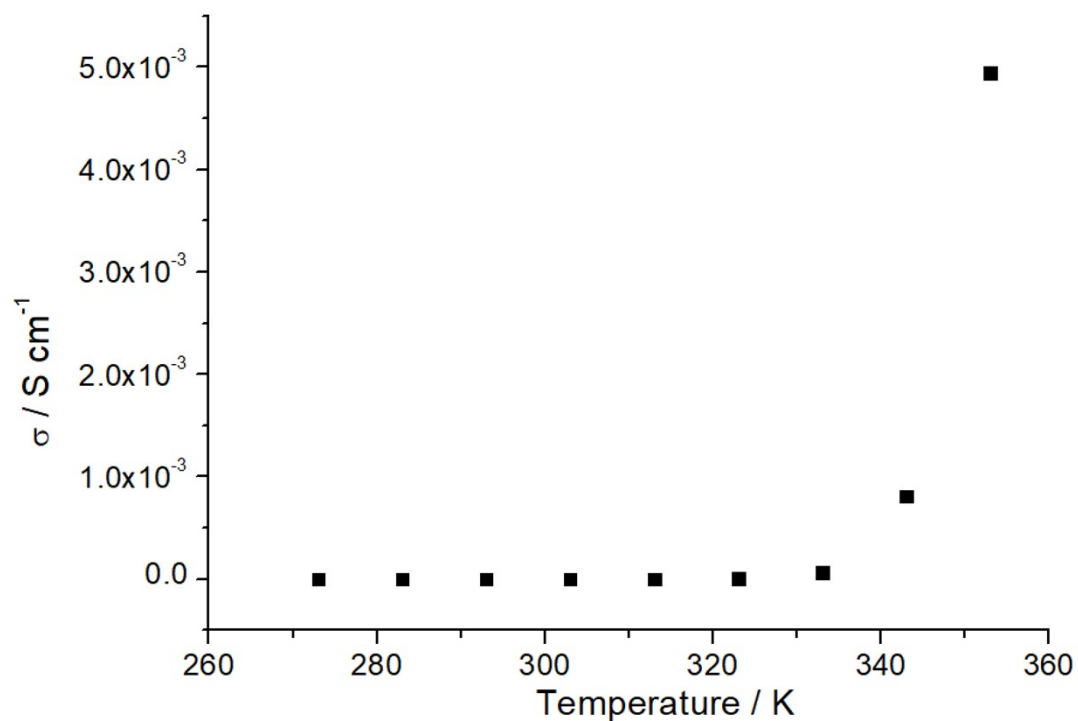

Figure S5. The plot of ionic conductivity versus temperature for **2** showing steeply increase at 353 K.

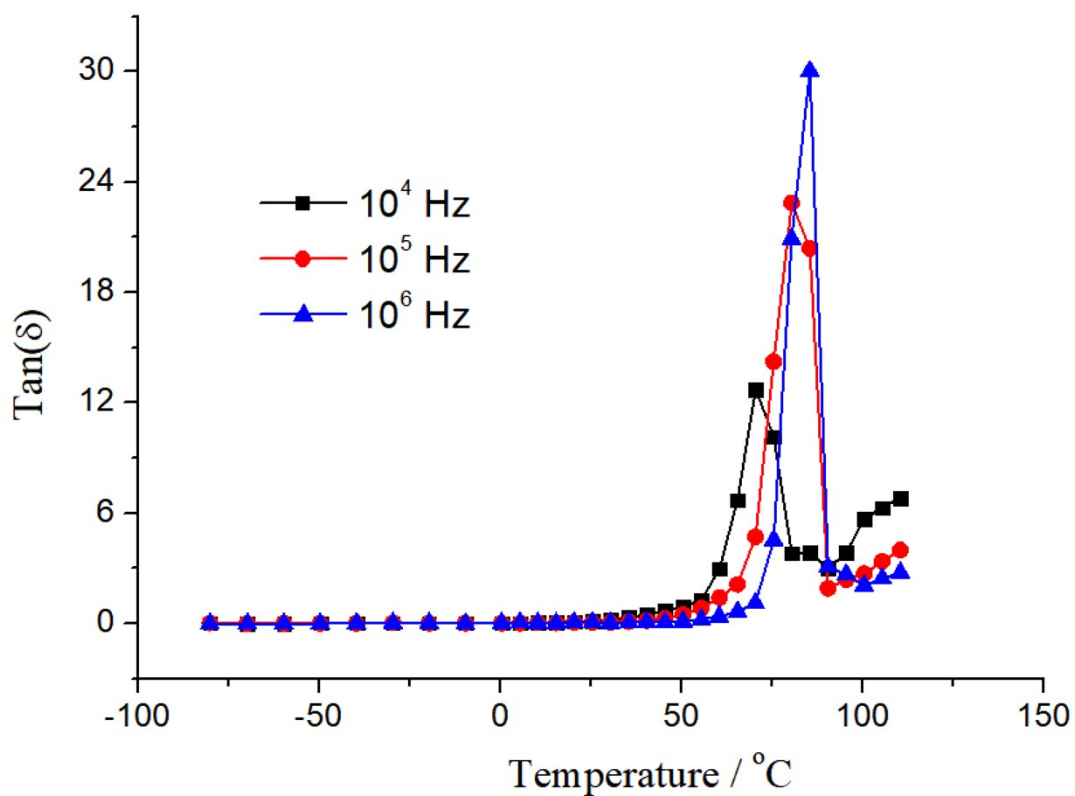

Figure S6. Temperature dependent dielectric loss showing relaxation peak at selected frequency of **1**.

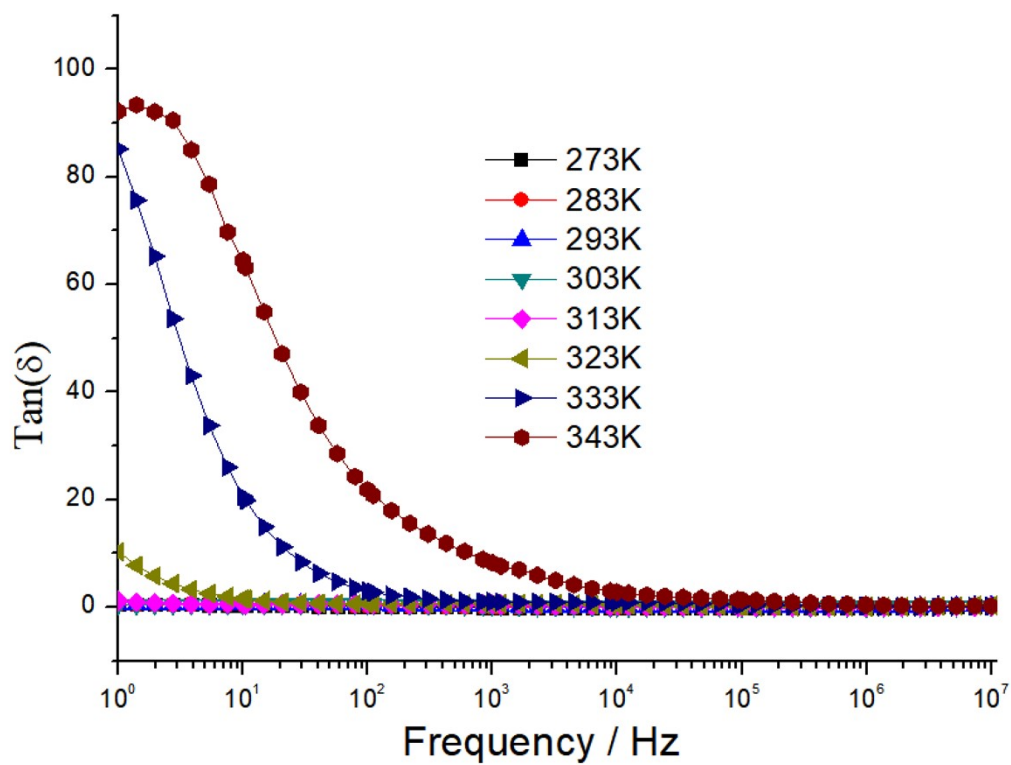

Figure S7. Frequency dependent dielectric loss at selected temperature of **1**.

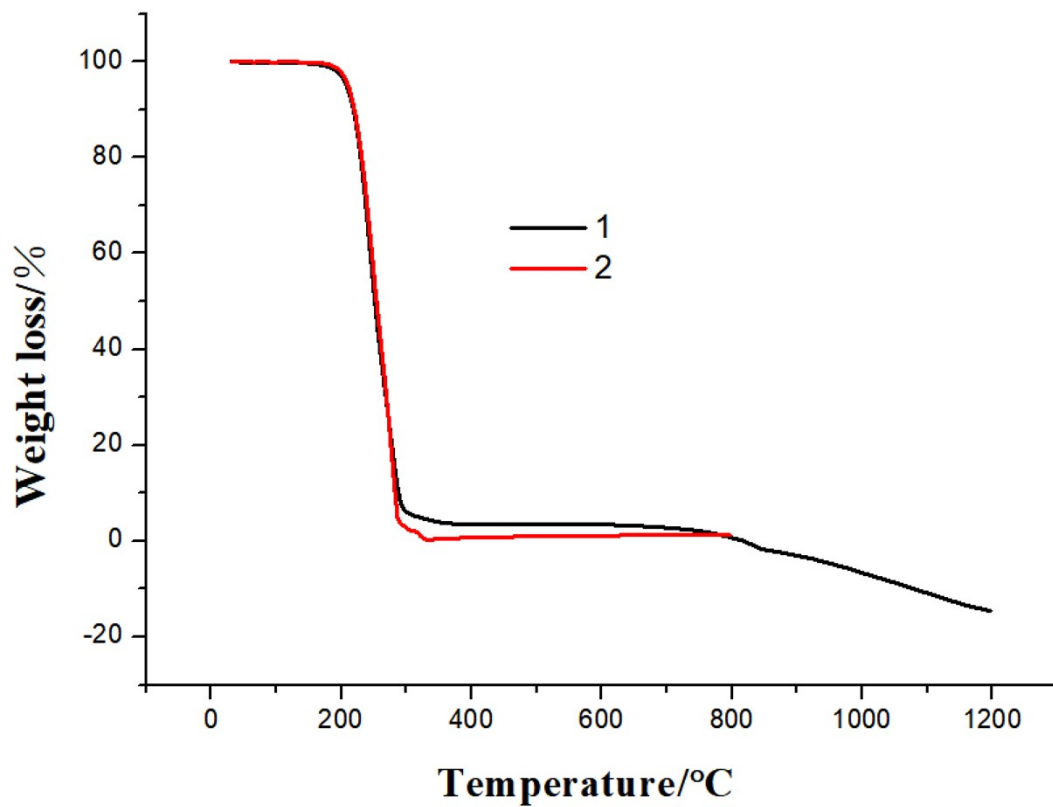

Figure S8. TGA curves of the **1** and **2** under the nitrogen
